# Supplementary material for: Trends and Implications of Metabolic Syndrome in Korea, 2007-2022: A Nationwide Study
Source: Research Square preprint supplement (doi:10.21203/rs.3.rs-5979489/v1), 2025-02-13
Supplement: Supplementary file 1 [file b1acfd1d3991763d1246454e.docx]

**Supplementary Table 1.** Age-standardized values of metabolic syndrome

|  | | 2007 | 2008 | 2009 | 2010 | 2011 | 2012 | 2013 | 2014 | 2015 | 2016 | 2017 | 2018 | 2019 | 2020 | 2021 | 2022 |
| --- | --- | --- | --- | --- | --- | --- | --- | --- | --- | --- | --- | --- | --- | --- | --- | --- | --- |
| Total | Unweighted n | 2,803 | 6,468 | 7,134 | 5,813 | 5,761 | 5,227 | 4,898 | 4,570 | 4,919 | 5,864 | 5,880 | 6,000 | 6,094 | 5,672 | 5,413 | 4,881 |
| WC, cm | 81.7±0.3 | 81.1±0.2 | 80.5±0.2 | 80.5±0.2 | 81.0±0.2 | 80.7±0.2 | 80.0±0.2 | 80.5±0.2 | 82.0±0.2 | 82.4±0.2 | 81.3±0.2 | 81.7±0.2 | 83.1±0.2 | 84.2±0.2 | 83.4±0.2 | 83.5±0.2 |
| Systolic BP, mmHg | 114.8±0.5 | 113.8±0.3 | 118.3±0.3 | 118.7±0.3 | 116.4±0.3 | 116.7±0.3 | 115.4±0.3 | 114.9±0.3 | 115.7±0.3 | 116.5±0.3 | 115.8±0.3 | 116.0±0.3 | 116.4±0.3 | 116.3±0.3 | 117.1±0.3 | 116.6±0.3 |
| Diastolic BP, mmHg | 75.7±0.4 | 74.7±0.2 | 78.2±0.2 | 77.1±0.3 | 75.8±0.2 | 75.7±0.3 | 74.9±0.2 | 74.6±0.3 | 74.9±0.2 | 75.8±0.2 | 75.6±0.2 | 75.9±0.2 | 75.9±0.2 | 76.1±0.2 | 73.7±0.2 | 73.6±0.2 |
| FPG, mg/dL | 94.1±0.6 | 96.9±0.3 | 96.1±0.3 | 95.8±0.3 | 95.7±0.3 | 96.1±0.4 | 97.3±0.3 | 97.7±0.4 | 98.3±0.4 | 98.9±0.4 | 98.1±0.4 | 98.6±0.3 | 98.7±0.4 | 99.2±0.4 | 99.9±0.3 | 98.4±0.3 |
| TG, mg/dL | 130.6±1.9 | 133.8±1.7 | 133.6±1.7 | 132.1±2.1 | 131.3±1.9 | 130.4±1.9 | 134.2±2.0 | 133.6±2.1 | 136.0±2.3 | 141.8±2.9 | 133.8±1.8 | 133.5±1.9 | 129.1±1.6 | 135.4±2.3 | 126.4±2.0 | 128.8±2.1 |
| HDL-C, mg/dL | 48.2±0.3 | 48.5±0.2 | 48.2±0.2 | 48.6±0.2 | 50.6±0.3 | 50.5±0.3 | 51.1±0.2 | 51.5±0.2 | 51.7±0.2 | 51.5±0.2 | 51.5±0.2 | 51.4±0.3 | 53.2±0.2 | 51.9±0.2 | 52.8±0.3 | 57.7±0.3 |
| Male | Unweighted n | 1,169 | 2,733 | 3,122 | 2,530 | 2,466 | 2,192 | 2,124 | 1,927 | 2,156 | 2,553 | 2,638 | 2,647 | 2,711 | 2,542 | 2,391 | 2,125 |
| WC, cm | 84.5±0.3 | 84.2±0.2 | 83.6±0.2 | 84.0±0.2 | 84.4±0.3 | 83.9±0.3 | 83.6±0.2 | 84.4±0.3 | 85.9±0.2 | 86.2±0.2 | 85.7±0.2 | 86.3±0.2 | 87.3±0.2 | 89.1±0.3 | 88.0±0.3 | 88.6±0.3 |
| Systolic BP, mmHg | 118.3±0.6 | 116.8±0.4 | 121.7±0.4 | 121.8±0.4 | 119.6±0.4 | 119.3±0.4 | 118.4±0.3 | 118.3±0.4 | 119.3±0.4 | 119.9±0.4 | 118.9±0.4 | 119.1±0.4 | 118.9±0.3 | 119.6±0.4 | 121.0±0.4 | 121.0±0.4 |
| Diastolic BP, mmHg | 78.8±0.4 | 77.5±0.3 | 81.5±0.3 | 80.2±0.4 | 78.9±0.3 | 78.2±0.3 | 77.5±0.3 | 77.3±0.3 | 77.7±0.3 | 78.4±0.2 | 78.2±0.3 | 78.5±0.3 | 77.9±0.3 | 79.0±0.3 | 76.3±0.3 | 76.5±0.3 |
| FPG, mg/dL | 96.1±0.8 | 98.2±0.4 | 97.6±0.4 | 98.2±0.6 | 98.3±0.5 | 97.2±0.4 | 99.0±0.4 | 99.9±0.5 | 101.0±0.6 | 101.6±0.7 | 100.5±0.5 | 101.8±0.6 | 101.2±0.5 | 102.1±0.6 | 102.8±0.5 | 101.2±0.5 |
| TG, mg/dL | 147.7±2.8 | 155.7±2.5 | 157.5±3.0 | 156.6±3.7 | 154.2±3.3 | 149.4±3.1 | 158.3±3.4 | 162.7±3.4 | 165.7±3.8 | 168.8±5.1 | 160.7±3.0 | 158.3±3.0 | 152.3±2.5 | 163.9±3.9 | 148.1±3.1 | 154.6±3.5 |
| HDL-C, mg/dL | 45.6±0.3 | 45.7±0.2 | 45.7±0.3 | 45.9±0.3 | 47.3±0.4 | 47.4±0.3 | 47.8±0.3 | 47.7±0.3 | 47.7±0.3 | 47.5±0.3 | 47.5±0.3 | 47.3±0.3 | 49.1±0.3 | 47.7±0.3 | 48.4±0.3 | 51.7±0.4 |
| Female | Unweighted n | 1,634 | 3,735 | 4,012 | 3,283 | 3,295 | 3,035 | 2,774 | 2,643 | 2,763 | 3,311 | 3,242 | 3,353 | 3,383 | 3,130 | 3,022 | 2,756 |
| WC, cm | 78.8±0.4 | 77.8±0.3 | 77.2±0.3 | 76.9±0.3 | 77.4±0.2 | 77.4±0.3 | 76.3±0.2 | 76.5±0.3 | 77.9±0.2 | 78.3±0.3 | 76.5±0.3 | 76.7±0.2 | 78.7±0.3 | 78.9±0.3 | 78.4±0.3 | 77.9±0.3 |
| Systolic BP, mmHg | 111.2±0.5 | 110.6±0.4 | 114.6±0.3 | 115.3±0.3 | 113.0±0.3 | 113.7±0.4 | 112.0±0.4 | 111.2±0.3 | 112.0±0.3 | 112.8±0.3 | 112.3±0.3 | 112.4±0.3 | 113.6±0.3 | 112.5±0.4 | 112.7±0.3 | 111.7±0.3 |
| Diastolic BP, mmHg | 72.6±0.4 | 71.8±0.3 | 74.7±0.2 | 73.8±0.3 | 72.7±0.2 | 73.0±0.3 | 72.2±0.3 | 71.7±0.3 | 72.0±0.2 | 73.0±0.2 | 72.7±0.2 | 73.1±0.2 | 73.7±0.3 | 73.0±0.2 | 70.9±0.2 | 70.5±0.2 |
| FPG, mg/dL | 92.1±0.6 | 95.4±0.4 | 94.6±0.4 | 93.4±0.3 | 93.0±0.3 | 95.1±0.5 | 95.6±0.5 | 95.5±0.4 | 95.5±0.4 | 96.2±0.5 | 95.5±0.4 | 95.3±0.3 | 96.1±0.4 | 96.1±0.4 | 96.9±0.4 | 95.6±0.4 |
| TG, mg/dL | 112.7±2.0 | 110.0±1.9 | 108.3±1.5 | 106.3±1.5 | 107.6±1.6 | 110.1±1.8 | 108.9±1.6 | 104.2±1.6 | 105.7±1.5 | 112.8±1.8 | 104.7±1.7 | 106.7±1.7 | 104.6±1.5 | 104.8±1.6 | 103.1±1.8 | 100.9±1.6 |
| HDL-C, mg/dL | 50.9±0.4 | 51.5±0.3 | 50.8±0.2 | 51.5±0.2 | 54.0±0.3 | 53.8±0.3 | 54.5±0.3 | 55.3±0.3 | 55.8±0.3 | 55.7±0.3 | 55.9±0.3 | 55.8±0.3 | 57.6±0.3 | 56.2±0.3 | 57.4±0.4 | 64.0±0.4 |

Values are expressed as mean ± standard error.

WC, waist circumference; BP, blood pressure; FPG, fasting plasma glucose; TG, triglyceride, HDL-C; high-density lipoprotein cholesterol.

**Supplementary Table 2.** Secular prevalence of metabolic syndrome by age and sex

| Variables | Age groups (Year) | Total | | | | | | Male | | | | | | Female | | | | | |
| --- | --- | --- | --- | --- | --- | --- | --- | --- | --- | --- | --- | --- | --- | --- | --- | --- | --- | --- | --- |
| 2007-2009 | 2010-2012 | 2013-2015 | 2016-2018 | 2019-2021 | 2022 | 2007-2009 | 2010-2012 | 2013-2015 | 2016-2018 | 2019-2021 | 2022 | 2007-2009 | 2010-2012 | 2013-2015 | 2016-2018 | 2019-2021 | 2022 |
| **Metabolic syndrome** | | | | | |  |  |  |  |  |  |  |  |  |  |  |  |  |  |
|  | 19-29 | 6.1 | 5.7 | 5.9 | 7.5 | 9.2 | 7.4 | 8.3 | 8.5 | 8.8 | 11.1 | 11.6 | 11.5 | 3.7 | 2.7 | 2.6 | 3.4 | 6.5 | 2.9 |
|  | 30-39 | 15.5 | 14.9 | 15.2 | 18.0 | 20.1 | 21.1 | 22.2 | 21.7 | 23.2 | 26.8 | 28.7 | 32.6 | 8.3 | 7.7 | 7.0 | 8.2 | 10.3 | 7.9 |
|  | 40-49 | 24.2 | 24.6 | 24.5 | 27.6 | 29.2 | 28.6 | 31.1 | 32.1 | 34.7 | 38.5 | 42.0 | 43.8 | 16.9 | 16.7 | 14.4 | 16.4 | 15.6 | 12.6 |
|  | 50-59 | 37.2 | 36.5 | 36.7 | 37.8 | 41.2 | 40.6 | 39.8 | 40.6 | 41.4 | 44.8 | 49.8 | 52.0 | 34.6 | 32.5 | 32.1 | 30.7 | 32.5 | 28.9 |
|  | 60-69 | 49.3 | 50.4 | 48.8 | 51.5 | 55.1 | 51.7 | 43.9 | 45.7 | 45.7 | 51.1 | 54.4 | 53.9 | 54.0 | 54.8 | 51.7 | 51.9 | 55.8 | 49.6 |
|  | ≥70 | 51.2 | 51.0 | 55.4 | 59.0 | 63.3 | 64.3 | 38.9 | 37.6 | 44.1 | 48.6 | 55.7 | 54.5 | 59.2 | 59.9 | 63.6 | 66.1 | 68.6 | 71.2 |
| **High WC** | |  | | | |  |  |  |  |  |  |  |  |  |  |  |  |  |  |
|  | 19-29 | 13.5 | 12.5 | 13.8 | 16.7 | 20.3 | 20.9 | 16.9 | 15.2 | 17.9 | 23.6 | 28.0 | 30.6 | 9.7 | 9.5 | 9.0 | 8.7 | 11.8 | 10.3 |
|  | 30-39 | 18.9 | 21.5 | 21.7 | 26.5 | 32.3 | 32.6 | 23.4 | 27.3 | 28.3 | 35.5 | 42.6 | 46.4 | 14.0 | 15.4 | 14.9 | 16.5 | 20.7 | 16.8 |
|  | 40-49 | 24.0 | 23.0 | 22.7 | 27.1 | 33.7 | 36.1 | 27.6 | 26.5 | 29.5 | 34.4 | 44.6 | 49.1 | 20.3 | 19.3 | 16.0 | 19.6 | 22.2 | 22.4 |
|  | 50-59 | 32.8 | 28.0 | 26.2 | 28.3 | 36.6 | 37.1 | 30.9 | 26.9 | 29.2 | 32.1 | 42.5 | 47.2 | 34.8 | 29.1 | 23.3 | 24.4 | 30.7 | 26.6 |
|  | 60-69 | 40.2 | 38.3 | 33.9 | 36.6 | 45.2 | 41.4 | 31.2 | 31.2 | 30.1 | 35.7 | 44.6 | 43.1 | 48.1 | 44.9 | 37.5 | 37.5 | 45.9 | 39.8 |
|  | ≥70 | 37.6 | 37.1 | 40.3 | 42.7 | 52.9 | 50.6 | 28.1 | 29.9 | 31.7 | 34.7 | 49.6 | 41.3 | 43.8 | 41.9 | 46.7 | 48.2 | 55.1 | 57.3 |
| **High BP** | |  | | | |  |  |  |  |  |  |  |  |  |  |  |  |  |  |
|  | 19-29 | 10.7 | 12.5 | 9.4 | 12.7 | 11.1 | 9.7 | 17.3 | 21.1 | 15.5 | 20.2 | 15.9 | 16.6 | 3.5 | 3.1 | 2.4 | 4.0 | 5.7 | 2.1 |
|  | 30-39 | 17.9 | 18.7 | 16.6 | 20.6 | 18.9 | 17.8 | 28.0 | 29.3 | 26.5 | 32.4 | 29.2 | 27.3 | 7.0 | 7.6 | 6.5 | 7.5 | 7.3 | 6.9 |
|  | 40-49 | 30.6 | 33.8 | 29.7 | 31.6 | 30.6 | 29.0 | 40.8 | 44.5 | 40.6 | 43.9 | 41.8 | 40.8 | 19.9 | 22.6 | 18.9 | 18.9 | 18.8 | 16.4 |
|  | 50-59 | 48.9 | 49.4 | 45.3 | 47.1 | 44.9 | 42.8 | 54.8 | 56.3 | 51.7 | 55.7 | 53.7 | 51.9 | 42.8 | 42.7 | 39.0 | 38.2 | 36.0 | 33.4 |
|  | 60-69 | 61.2 | 67.0 | 59.5 | 59.4 | 59.4 | 57.4 | 61.3 | 66.6 | 58.9 | 61.4 | 62.0 | 62.5 | 61.1 | 67.4 | 60.0 | 57.5 | 56.9 | 52.5 |
|  | ≥70 | 72.7 | 74.9 | 72.1 | 77.4 | 75.7 | 77.2 | 68.1 | 66.9 | 68.2 | 74.6 | 70.2 | 73.9 | 75.7 | 80.2 | 74.9 | 79.2 | 79.4 | 79.7 |
| **High glucose** | |  | | | |  |  |  |  |  |  |  |  |  |  |  |  |  |  |
|  | 19-29 | 6.2 | 5.9 | 7.2 | 8.2 | 10.5 | 9.9 | 7.9 | 7.9 | 9.7 | 10.3 | 12.1 | 12.5 | 4.4 | 3.8 | 4.3 | 5.7 | 8.8 | 7.2 |
|  | 30-39 | 16.0 | 14.5 | 19.5 | 20.2 | 25.0 | 24.8 | 20.4 | 19.1 | 25.6 | 26.3 | 32.4 | 32.8 | 11.4 | 9.6 | 13.2 | 13.5 | 16.6 | 15.6 |
|  | 40-49 | 27.0 | 26.1 | 31.7 | 34.7 | 36.5 | 32.1 | 33.9 | 33.0 | 42.0 | 45.3 | 47.8 | 43.8 | 19.7 | 19.0 | 21.4 | 23.9 | 24.6 | 19.7 |
|  | 50-59 | 38.4 | 37.7 | 43.1 | 44.9 | 47.7 | 48.3 | 44.9 | 46.2 | 51.7 | 55.1 | 56.3 | 61.4 | 31.9 | 29.3 | 34.7 | 34.4 | 39.1 | 34.9 |
|  | 60-69 | 45.7 | 47.0 | 52.7 | 52.9 | 54.7 | 54.6 | 50.4 | 52.6 | 58.9 | 59.7 | 62.3 | 62.9 | 41.4 | 41.9 | 47.1 | 46.3 | 47.4 | 46.8 |
|  | ≥70 | 45.0 | 45.0 | 52.9 | 57.3 | 59.0 | 59.9 | 44.5 | 44.0 | 54.0 | 57.8 | 62.0 | 61.4 | 45.3 | 45.6 | 52.1 | 56.9 | 56.9 | 58.9 |
| **High TG** | |  | | | |  |  |  |  |  |  |  |  |  |  |  |  |  |  |
|  | 19-29 | 16.3 | 13.5 | 14.7 | 18.9 | 15.1 | 16.1 | 23.7 | 19.7 | 21.3 | 27.4 | 20.7 | 23.3 | 8.2 | 6.8 | 7.1 | 9.0 | 9.0 | 8.3 |
|  | 30-39 | 25.6 | 25.3 | 27.8 | 29.4 | 28.8 | 29.2 | 37.7 | 37.4 | 42.4 | 42.8 | 41.0 | 41.9 | 12.7 | 12.5 | 12.7 | 14.6 | 15.0 | 14.7 |
|  | 40-49 | 33.2 | 33.6 | 35.3 | 36.1 | 37.1 | 35.8 | 46.0 | 46.6 | 51.5 | 51.9 | 53.8 | 51.8 | 19.7 | 20.0 | 19.2 | 19.8 | 19.4 | 18.9 |
|  | 50-59 | 38.0 | 43.3 | 42.5 | 43.5 | 45.4 | 48.8 | 44.8 | 51.9 | 50.1 | 53.1 | 54.3 | 59.7 | 31.0 | 34.9 | 35.2 | 33.6 | 36.4 | 37.7 |
|  | 60-69 | 43.1 | 45.4 | 47.3 | 51.2 | 53.8 | 51.9 | 42.8 | 43.1 | 46.6 | 50.3 | 53.1 | 50.7 | 43.3 | 47.4 | 47.9 | 52.0 | 54.6 | 53.0 |
|  | ≥70 | 37.4 | 40.4 | 44.8 | 46.7 | 48.3 | 55.3 | 31.4 | 32.6 | 38.1 | 41.2 | 42.0 | 46.4 | 41.3 | 45.6 | 49.7 | 50.5 | 52.6 | 61.6 |
| **Low HDL-C** | |  | | | |  |  |  |  |  |  |  |  |  |  |  |  |  |  |
|  | 19-29 | 27.9 | 25.9 | 19.5 | 19.8 | 18.8 | 11.9 | 22.2 | 20.6 | 14.5 | 17.7 | 14.6 | 12.2 | 34.2 | 31.7 | 25.3 | 22.2 | 23.4 | 11.6 |
|  | 30-39 | 40.8 | 32.1 | 28.0 | 27.2 | 23.9 | 18.9 | 33.9 | 27.0 | 24.2 | 24.3 | 22.6 | 22.1 | 48.2 | 37.4 | 32.0 | 30.4 | 25.3 | 15.2 |
|  | 40-49 | 43.1 | 38.2 | 33.5 | 34.3 | 30.4 | 27.2 | 34.9 | 31.5 | 28.9 | 33.6 | 31.0 | 34.5 | 51.8 | 45.2 | 38.0 | 34.9 | 29.9 | 19.5 |
|  | 50-59 | 48.3 | 44.8 | 40.9 | 40.9 | 41.4 | 36.2 | 39.3 | 36.7 | 33.2 | 37.3 | 39.0 | 36.1 | 57.5 | 52.8 | 48.5 | 44.5 | 43.7 | 36.4 |
|  | 60-69 | 57.7 | 53.7 | 52.4 | 53.3 | 54.3 | 46.2 | 42.7 | 40.4 | 40.1 | 44.1 | 45.1 | 37.6 | 71.0 | 65.9 | 63.7 | 62.1 | 63.2 | 54.3 |
|  | ≥70 | 60.1 | 56.7 | 57.4 | 59.5 | 60.2 | 58.2 | 42.4 | 38.3 | 38.7 | 42.9 | 46.8 | 45.1 | 71.8 | 69.0 | 71.1 | 70.7 | 69.4 | 67.5 |

Values are expressed as percentages.

WC=waist circumference, BP=blood pressure, TG=triglyceride, HDL-C=high-density lipoprotein cholesterol.

**Supplementary Table 3.** Health behaviors according to the presence of metabolic syndrome, 2019-2022

|  |  | Metabolic Syndrome | | *P* value |
| --- | --- | --- | --- | --- |
|  |  | No | Yes |
| Total | Current Smoking* | 17.4 | 21.0 | <.0001 |
| Heavy Drinking† | 11.2 | 15.8 | <.0001 |
| Physical Activity‡ | 50.0 | 39.3 | <.0001 |
| Male | Current Smoking | 30.8 | 33.5 | 0.0134 |
| Heavy Drinking | 17.0 | 24.8 | <.0001 |
| Physical Activity | 53.8 | 42.8 | <.0001 |
| Female | Current Smoking | 5.7 | 4.7 | 0.0567 |
| Heavy Drinking | 6.1 | 4.1 | <.0001 |
| Physical Activity | 46.7 | 34.6 | <.0001 |

Values are expressed as percentages.

*Current smoking was defined as those currently smoking and having smoked more than 5 packs (100 cigarettes) throughout their lifetime,

†Heavy drinking was defined as those who drank more than twice per week and consumed more than 7 glasses of alcohol per occasion for male and 5 glasses for female within the past year,

‡Physical activity was defined as those who spent more than 150 minutes on moderate physical activity or 75 minutes on vigorous physical activity, or an equivalent combination. (vigorous physical activity 1 minute = moderate physical activity 2 min)
